# Supplementary material for: Effects of a 16-week multimodal exercise program on gait performance in individuals with dementia: a multicenter randomized controlled trial
Source: PubMed Central journal article supplement (PMC7364487; doi:10.1186/s12877-020-01635-3), 2020-07-16
Supplement: 12877_2020_1635_MOESM1_ESM.pdf [file 12877_2020_1635_MOESM1_ESM.pdf]

**Additional file 1.** Sample characteristics of participants at baseline (intention-to-treat analysis)

|                                                 | <b>Intervention group</b><br>[n=194] | <b>Control group</b><br>[n=110] | <b>Group differences</b><br>[t(df)/z/Chi <sup>2</sup> (df), p] |
|-------------------------------------------------|--------------------------------------|---------------------------------|----------------------------------------------------------------|
| <b>Age, years</b><br>[M (SD), range]            | 86 (6), 67-102                       | 87 (6), 66-98                   | t(302)=1.135, p=0.257                                          |
| <b>Sex, female</b>                              | 85%                                  | 89%                             | Chi <sup>2</sup> (1)=1.223, p=0.269                            |
| <b>Type of dementia</b>                         |                                      |                                 | Chi <sup>2</sup> =9.005, p=0.050                               |
| - Alzheimer's disease                           | 19%                                  | 14%                             |                                                                |
| - Vascular dementia                             | 18%                                  | 10%                             |                                                                |
| - Mixed dementia                                | 2%                                   | 4%                              |                                                                |
| - other                                         | 2%                                   | 0%                              |                                                                |
| - unknown                                       | 26%                                  | 37%                             |                                                                |
| - no confirmed/unknown diagnosis                | 34%                                  | 36%                             |                                                                |
| <b>MMSE</b> [M (SD), range]                     | 17 (4), 10-24                        | 17 (4), 10-24                   | t(250.853)=0.389, p=0.698                                      |
| <b>Use of walking aid</b>                       |                                      |                                 | Chi <sup>2</sup> (2)=4.104, p=0.128                            |
| - walker                                        | 69%                                  | 75%                             |                                                                |
| - walking stick/s                               | 4%                                   | 8%                              |                                                                |
| - no walking aid                                | 24%                                  | 16%                             |                                                                |
|                                                 | unknown in 3%                        | unknown in 1%                   |                                                                |
| <b>CIRS</b> [M (SD), range]                     |                                      |                                 |                                                                |
| - Morbidity Index                               | 9 (4), 1-20                          | 10 (6), 2-26                    | t(176)=0.469, p=0.640                                          |
| - Severity Index                                | 1.6 (0.4), 1-3                       | 1.6 (0.5), 1-3                  | z=-0.273, p=0.785                                              |
|                                                 | not available for 37%                | not available for 50%           |                                                                |
| <b>Number of medications</b> [M (SD), range]    | 7 (4), 0-27                          | 6 (4), 0-20                     | <b>t(232)=-2.686, p=0.008</b>                                  |
|                                                 | unknown in 22%                       | unknown in 25%                  |                                                                |
| <b>BMI, kg/m<sup>2</sup></b><br>[M (SD), range] | 28.5 (4.7), 18.1-48.5                | 27.2 (4.8), 17.6-38.0           | <b>t(268)=-2.307, p=0.022</b>                                  |
|                                                 | unknown in 12%                       | unknown in 9%                   |                                                                |

BMI: Body Mass Index, CIRS: Cumulative Illness Rating Scale, df: degree of freedom, M: mean, MMSE: Mini-Mental State Examination, n: number, SD: standard deviation

Statistically significant results appear bold
