# Supplementary material for: Effects of a 16-week multimodal exercise program on gait performance in individuals with dementia: a multicenter randomized controlled trial
Source: PubMed Central journal article supplement (PMC7364487; doi:10.1186/s12877-020-01635-3), 2020-07-16
Supplement: 12877_2020_1635_MOESM2_ESM.pdf [file 12877_2020_1635_MOESM2_ESM.pdf]

**Additional file 2.** Effects of the multimodal exercise program on spatiotemporal gait parameters and dual task costs (intention-to-treat analysis)

|                                                             |    | <b>Baseline</b><br>[M (SE)] | <b>Group differences<br/>at baseline</b><br>[t(df), p] | <b>Post</b><br>[M (SE)] | <b>Difference post –<br/>baseline</b><br>[M (SE), [CI <sub>95</sub> ]] | <b>Within group time<br/>effects</b><br>[t(df), p] | <b>Time*group effects</b><br>F(df <sub>numerator</sub> ,<br>df <sub>denominator</sub> ), p | <b>Effect<br/>size <math>\eta_p^2</math></b> |
|-------------------------------------------------------------|----|-----------------------------|--------------------------------------------------------|-------------------------|------------------------------------------------------------------------|----------------------------------------------------|--------------------------------------------------------------------------------------------|----------------------------------------------|
| <i>Single task (IG: n=194, CG: n=110)</i>                   |    |                             |                                                        |                         |                                                                        |                                                    |                                                                                            |                                              |
| <b>Walking speed,</b><br>m/sec                              | IG | 0.62 (0.01)                 | t(136275)=-0.672,<br>p=0.502                           | 0.61 (0.01)             | -0.01 (0.01), [-0.03,<br>0.02]                                         | t(121)=0.573, p=0.568                              | F(1,302)=0.001<br>to 0.395,<br>p=0.530 to<br>0.977                                         | 0.000 to<br>0.001                            |
|                                                             | CG | 0.60 (0.02)                 |                                                        | 0.60 (0.02)             |                                                                        | 0.00 (0.02), [-0.03,<br>0.03]                      |                                                                                            |                                              |
| <b>Stride length,</b> cm                                    | IG | 77.7 (1.4)                  | t(2596)=0.553,<br>p=0.580                              | 77.4 (1.6)              | -0.3 (1.4), [-3.0, 2.5]                                                | t(27)=0.190, p=0.851                               | F(1,302)=0.001<br>to 2.814,<br>p=0.094 to<br>0.977 <sup>a, b</sup>                         | 0.000 to<br>0.009                            |
|                                                             | CG | 78.9 (1.7)                  |                                                        | 77.6 (1.9)              |                                                                        | -1.3 (1.7), [-4.7, 2.0]                            |                                                                                            |                                              |
| <b>Stride time,</b> sec                                     | IG | 1.3 (0.0)                   | <b>t(1200)=1.975,<br/>p=0.049</b>                      | 1.3 (0.0)               | 0.0 (0.0), [0.0, 0.1]                                                  | t(46)=-1.224, p=0.227*                             | F(1,302)=0.325<br>to 4.944,<br>p=0.027 to<br>0.569*                                        | 0.001 to<br>0.016                            |
|                                                             | CG | 1.4 (0.0)                   |                                                        | 1.4 (0.0)               |                                                                        | 0.0 (0.0), [-0.1, 0.0]                             |                                                                                            |                                              |
| <b>Double support,</b><br>% of stride time                  | IG | 40.0 (0.6)                  | t(3372)=0.327,<br>p=0.743                              | 40.7 (0.6)              | 0.7 (0.6), [-0.4, 1.8]                                                 | t(59)=-1.318, p=0.192*                             | F(1,302)=0.002<br>to 0.265,<br>p=0.607 to<br>0.961 <sup>b</sup>                            | 0.000 to<br>0.001                            |
|                                                             | CG | 40.3 (0.7)                  |                                                        | 41.2 (0.8)              |                                                                        | 0.9 (0.7), [-0.4, 2.2]                             |                                                                                            |                                              |
| <b>Stance phase,</b> %<br>of stride time                    | IG | 69.8 (0.3)                  | t(1915)=0.305,<br>p=0.760                              | 70.2 (0.3)              | 0.4 (0.3), [-0.1, 1.0]                                                 | t(83)=-1.612, p=0.111*                             | F(1,302)=0.000<br>to 0.149,<br>p=0.700 to<br>0.988                                         | 0.000                                        |
|                                                             | CG | 70.0 (0.4)                  |                                                        | 70.4 (0.5)              |                                                                        | 0.5 (0.4), [-0.3, 1.3]                             |                                                                                            |                                              |
| <i>Dual task, counting backwards (IG: n=194, CG: n=110)</i> |    |                             |                                                        |                         |                                                                        |                                                    |                                                                                            |                                              |
| <b>Walking speed,</b><br>m/sec                              | IG | 0.49 (0.01)                 | t(792)=-1.75,<br>p=0.079*                              | 0.49 (0.01)             | 0.00 (0.02), [-0.03,<br>0.03]                                          | t(24)=0.035, p=0.972                               | F(1,302)=0.004<br>to 1.043,<br>p=0.308 to<br>0.948                                         | 0.000 to<br>0.003                            |
|                                                             | CG | 0.46 (0.02)                 |                                                        | 0.47 (0.02)             |                                                                        | 0.01 (0.02), [-0.02,<br>0.04]                      |                                                                                            |                                              |
| <b>Stride length,</b> cm                                    | IG | 71.2 (1.4)                  |                                                        | 73.1 (1.6)              | 1.9 (1.6), [-1.4, 5.2]                                                 | t(20)=-1.194, p=0.246*                             |                                                                                            |                                              |

|                                             |    |            |                            |            |                         |                        |                                                                    |                   |
|---------------------------------------------|----|------------|----------------------------|------------|-------------------------|------------------------|--------------------------------------------------------------------|-------------------|
|                                             | CG | 69.8 (1.8) | t(1093)=-0.629,<br>p=0.529 | 72.7 (2.1) | 2.9 (2.2), [-1.5, 7.4]  | t(25)=-1.328, p=0.196* | F(1,302)=0.063<br>to 1.212,<br>p=0.272 to<br>0.802 <sup>b</sup>    | 0.000 to<br>0.004 |
| <b>Stride time, sec</b>                     | IG | 1.5 (0.0)  |                            | 1.6 (0.0)  | 0.0 (0.0), [0.0, 0.1]   | t(30)=-0.836, p=0.410* | F(1,302)=0.000<br>to 4.518,<br>p=0.034 to<br>0.996 <sup>a, b</sup> | 0.000 to<br>0.015 |
|                                             | CG | 1.6 (0.0)  | t(108)=1.764,<br>p=0.081*  | 1.7 (0.1)  | 0.1 (0.1), [0.0, 0.2]   | t(26)=-1.118, p=0.274* |                                                                    |                   |
| <b>Double support,<br/>% of stride time</b> | IG | 43.8 (0.7) |                            | 43.6 (0.8) | -0.2 (0.9), [-2.0, 1.6] | t(19)=0.237, p=0.815   | F(1,302)=0.002<br>to 1.099,<br>p=0.295 to<br>0.969                 | 0.000 to<br>0.004 |
|                                             | CG | 45.4 (0.9) | t(212)=1.383,<br>p=0.168   | 45.1 (1.0) | -0.3 (1.0), [-2.2, 1.7] | t(32)=0.275, p=0.785   |                                                                    |                   |
| <b>Stance phase, %<br/>of stride time</b>   | IG | 71.7 (0.4) |                            | 71.8 (0.4) | 0.1 (0.4), [-0.8, 1.0]  | t(24)=-0.210, p=0.835  | F(1,302)=0.035<br>to 2.770,<br>p=0.097 to<br>0.852                 | 0.000 to<br>0.009 |
|                                             | CG | 72.7 (0.5) | t(73)=1.482,<br>p=0.143*   | 72.4 (0.5) | -0.3 (0.6), [-1.5, 0.8] | t(29)=0.566, p=0.575*  |                                                                    |                   |

*Dual-task costs, counting backwards (IG: n=194, CG: n=110)*

|                              |    |             |                                  |             |                         |                              |                                                                    |                   |
|------------------------------|----|-------------|----------------------------------|-------------|-------------------------|------------------------------|--------------------------------------------------------------------|-------------------|
| <b>Walking speed,<br/>%</b>  | IG | -17.1 (2.0) |                                  | -15.4 (2.9) | 1.7 (3.3), [-4.9, 8.4]  | t(18)=-0.534, p=0.600        | F(1,302)=0.032<br>to 2.378,<br>p=0.124 to<br>0.859 <sup>b</sup>    | 0.000 to<br>0.008 |
|                              | CG | -22.2 (2.0) | t(205)=1.649,<br>p=0.101*        | -17.8 (3.7) | 4.4 (4.1), [-3.7, 12.5] | t(85)=-1.067, p=0.289        |                                                                    |                   |
| <b>Stride length, %</b>      | IG | -6.9 (1.5)  |                                  | -3.5 (2.5)  | 3.4 (2.8), [-2.5, 9.4]  | t(13)=-1.212, p=0.246*       | F(1,302)=1.125<br>to 6.013,<br>p=0.015 to<br>0.290 <sup>a, b</sup> | 0.004 to<br>0.015 |
|                              | CG | -11.5 (1.4) | <b>t(93)=-2.192,<br/>p=0.031</b> | -3.6 (3.1)  | 7.9 (3.4), [1.1, 14.8]  | <b>t(22)=-2.346, p=0.028</b> |                                                                    |                   |
| <b>Stride time, %</b>        | IG | 17.4 (2.1)  |                                  | 18.6 (2.4)  | 1.2 (2.8), [-4.4, 6.9]  | t(31)=-0.444, p=0.660        | F(1,302)=0.000<br>to 4.709,<br>p=0.031 to<br>0.998*                | 0.000 to<br>0.015 |
|                              | CG | 18.9 (2.2)  | t(92)=0.513,<br>p=0.609          | 24.3 (3.5)  | 5.3 (3.8), [-2.2, 12.9] | t(27)=-1.414, p=0.169*       |                                                                    |                   |
| <b>Double support,<br/>%</b> | IG | 10.4 (1.2)  |                                  | 8.4 (1.8)   | -2.0 (2.0), [-6.1, 2.1] | t(19)=1.004, p=0.328*        | F(1,302)=0.000<br>to 0.715,<br>p=0.398 to<br>0.998 <sup>a, b</sup> | 0.000 to<br>0.002 |
|                              | CG | 13.4 (1.6)  | t(106)=1.572,<br>p=0.119*        | 11.0 (2.3)  | -2.4 (2.5), [-7.4, 2.6] | t(32)=0.949, p=0.350*        |                                                                    |                   |
| <b>Stance phase, %</b>       | IG | 2.8 (0.4)   |                                  | 2.4 (0.6)   | -0.5 (0.7), [-1.8, 0.9] | t(21)=0.716, p=0.482*        |                                                                    |                   |

|                                                               |    |             |                           |             |                               |                              |                                                                     |                   |
|---------------------------------------------------------------|----|-------------|---------------------------|-------------|-------------------------------|------------------------------|---------------------------------------------------------------------|-------------------|
|                                                               | CG | 4.0 (0.5)   | t(39)=1.679,<br>p=0.101*  | 2.9 (0.7)   | -1.1 (0.9), [-3.0, 0.7]       | t(28)=1.222, p=0.232*        | F(1,302)=0.001<br>to 3.165,<br>p=0.076 to<br>0.976 <sup>b</sup>     | 0.000 to<br>0.010 |
| <i>Dual task, naming animals (IG: n=194, CG: n=110)</i>       |    |             |                           |             |                               |                              |                                                                     |                   |
| <b>Walking speed,</b><br>m/sec                                | IG | 0.41 (0.01) | t(103)=-0.706,<br>p=0.482 | 0.42 (0.01) | 0.01 (0.01), [-0.02,<br>0.03] | t(75)=-0.554, p=0.581        | F(1,302)=0.002<br>to 0.974,<br>p=0.324 to<br>0.967                  | 0.000 to<br>0.003 |
|                                                               | CG | 0.40 (0.01) |                           | 0.41 (0.01) | 0.01 (0.01), [-0.02,<br>0.04] | t(98)=-0.846, p=0.400        |                                                                     |                   |
| <b>Stride length,</b> cm                                      | IG | 64.9 (1.4)  | t(140)=0.394,<br>p=0.694  | 67.7 (1.3)  | 2.8 (1.4), [0.0, 5.5]         | t(25)=-2.009, p=0.056*       | F(1,302)=0.001<br>to 3.912,<br>p=0.049 to<br>0.971*                 | 0.000 to<br>0.013 |
|                                                               | CG | 65.8 (1.7)  |                           | 66.4 (1.6)  | 0.6 (1.9), [-3.2, 4.5]        | t(31)=-0.316, p=0.754        |                                                                     |                   |
| <b>Stride time,</b> sec                                       | IG | 1.7 (0.0)   | t(134)=1.788,<br>p=0.076* | 1.7 (0.0)   | 0.0 (0.0), [0.0, 0.1]         | t(28)=-0.971, p=0.340*       | F(1,302)=1.921<br>to 10.040,<br>p=0.002 to<br>0.167 <sup>a, b</sup> | 0.006 to<br>0.032 |
|                                                               | CG | 1.8 (0.0)   |                           | 1.7 (0.1)   | -0.1 (0.1), [-0.2, 0.1]       | t(21)=1.003, p=0.327*        |                                                                     |                   |
| <b>Double support,</b><br>% of stride time                    | IG | 47.6 (0.7)  | t(98)=0.733,<br>p=0.465   | 46.8 (0.7)  | -0.8 (0.7), [-2.2, 0.6]       | t(51)=1.122, p=0.267*        | F(1,302)=0.016<br>to 2.222,<br>p=0.137 to<br>0.901                  | 0.000 to<br>0.007 |
|                                                               | CG | 48.4 (1.0)  |                           | 48.0 (0.9)  | -0.4 (1.0), [-2.5, 1.7]       | t(32)=0.382, p=0.705         |                                                                     |                   |
| <b>Stance phase,</b> %<br>of stride time                      | IG | 73.5 (0.3)  | t(79)=1.456,<br>p=0.149*  | 73.2 (0.4)  | -0.3 (0.4), [-1.1, 0.5]       | t(37)=0.784, p=0.438*        | F(1,302)=0.092<br>to 3.400,<br>p=0.066 to<br>0.761 <sup>a</sup>     | 0.000 to<br>0.011 |
|                                                               | CG | 74.4 (0.5)  |                           | 73.9 (0.6)  | -0.5 (0.6), [-1.8, 0.8]       | t(19)=0.796, p=0.436*        |                                                                     |                   |
| <i>Dual-task costs, naming animals (IG: n=194, CG: n=110)</i> |    |             |                           |             |                               |                              |                                                                     |                   |
| <b>Walking speed,</b><br>%                                    | IG | -29.3 (2.5) | t(46)=-0.684,<br>p=0.498  | -26.7 (2.3) | 2.6 (2.7), [-2.8, 8.0]        | t(27)=-0.977, p=0.337*       | F(1,302)=0.010<br>to 1.900,<br>p=0.169 to<br>0.922 <sup>a, b</sup>  | 0.000 to<br>0.006 |
|                                                               | CG | -31.7 (2.0) |                           | -26.8 (4.0) | 4.9 (3.9), [-2.9, 12.7]       | t(37)=-1.249, p=0.220*       |                                                                     |                   |
| <b>Stride length,</b> %                                       | IG | -14.9 (1.7) | t(34)=-0.565,<br>p=0.576  | -10.1 (1.8) | 4.8 (2.2), [0.4, 9.2]         | <b>t(20)=-2.235, p=0.037</b> | F(1,302)=0.001<br>to 2.157,                                         | 0.000 to<br>0.007 |
|                                                               | CG | -16.3 (1.6) |                           | -11.8 (2.9) | 4.5 (3.0), [-1.6, 10.5]       | t(22)=-1.496, p=0.149*       |                                                                     |                   |

|                          |    |            |                       |            |                          |                       |  |                                                           |                |
|--------------------------|----|------------|-----------------------|------------|--------------------------|-----------------------|--|-----------------------------------------------------------|----------------|
|                          |    |            |                       |            |                          |                       |  | p=0.143 to 0.980 <sup>b</sup>                             |                |
| <b>Stride time, %</b>    | IG | 28.2 (2.5) | t(103)=0.120, p=0.905 | 28.9 (2.4) | 0.7 (2.8), [-4.8, 6.3]   | t(63)=-0.263, p=0.794 |  | F(1,302)=0.014 to 3.057, p=0.081 to 0.907 <sup>a, b</sup> | 0.000 to 0.010 |
|                          | CG | 28.7 (2.8) |                       | 26.3 (3.9) | -2.4 (4.2), [-10.9, 6.2] | t(16)=0.561, p=0.582* |  |                                                           |                |
| <b>Double support, %</b> | IG | 21.0 (1.4) | t(68)=0.089, p=0.929  | 17.0 (1.8) | -4.0 (2.1), [-8.1, 0.1]  | t(32)=1.931, p=0.063* |  | F(1,302)=0.013 to 2.661, p=0.104 to 0.911                 | 0.000 to 0.009 |
|                          | CG | 21.2 (1.9) |                       | 18.4 (2.6) | -2.8 (3.0), [-8.9, 3.3]  | t(25)=0.923, p=0.365* |  |                                                           |                |
| <b>Stance phase, %</b>   | IG | 5.4 (0.4)  | t(62)=1.416, p=0.162* | 4.3 (0.5)  | -1.1 (0.6), [-2.3, 0.1]  | t(29)=1.807, p=0.081* |  | F(1,302)=0.000 to 3.328, p=0.069 to 0.996 <sup>b</sup>    | 0.000 to 0.011 |
|                          | CG | 6.4 (0.6)  |                       | 5.1 (0.8)  | -1.4 (0.9), [-3.1, 0.4]  | t(22)=1.601, p=0.123* |  |                                                           |                |

CG: control group, CI<sub>95</sub>: 95% confidence interval, df: degrees of freedom, IG: intervention group, M: mean, n: number, SE: standard error

\* statistically significant in single imputations, <sup>a</sup> variance homogeneity not fulfilled in all imputations, <sup>b</sup> covariance homogeneity not fulfilled in all imputations

Statistically significant results appear bold for  $\alpha=0.05$ . When considering adjusted significance levels using Bonferroni-Holm correction for multiple comparisons, no statistically significant results were observed.
