# Supplementary material for: Effects of a 16-week multimodal exercise program on gait performance in individuals with dementia: a multicenter randomized controlled trial
Source: PubMed Central journal article supplement (PMC7364487; doi:10.1186/s12877-020-01635-3), 2020-07-16
Supplement: 12877_2020_1635_MOESM3_ESM.pdf [file 12877_2020_1635_MOESM3_ESM.pdf]

**Additional file 3.** Differences in baseline motor and cognitive performance as well as etiology of dementia and the use of walking aids between positive, non-, and negative responders in the intervention group (statistical nonsignificant results, per protocol analysis)

|                                    | Negative responders | Non-responders | Positive responders | Between group difference                                                         |
|------------------------------------|---------------------|----------------|---------------------|----------------------------------------------------------------------------------|
|                                    |                     | Mean (SD)      |                     | F(df <sub>numerator</sub> , df <sub>denominator</sub> )/Chi <sup>2</sup> (df), p |
| <i>Single task, walking speed</i>  |                     |                |                     |                                                                                  |
| FICSIT-4 (n=88)                    | 2.4 (1.3)           | 2.4 (1.4)      | 2.1 (1.7)           | Chi <sup>2</sup> (2)=0.726, p=0.695                                              |
| Walking speed, m/sec (n=89)        | 0.67 (0.19)         | 0.69 (0.18)    | 0.59 (0.22)         | F(2,86)=1.771, p=0.176                                                           |
| TUG, sec (n=89)                    | 23.3 (12.5)         | 20.9 (12.5)    | 23.4 (10.1)         | Chi <sup>2</sup> (2)=1.802, p=0.406                                              |
| Modified 30s CST (n=77)            | 7.7 (3.4)           | 8.7 (3.5)      | 7.7 (4.6)           | F(2,74)=0.754, p=0.474                                                           |
| Modified SPPB (n=84)               | 6.6 (2.7)           | 7.2 (2.4)      | 6.6 (3.4)           | Chi <sup>2</sup> (2)=0.694, p=0.707                                              |
| Clock Drawing Test (n=81)          | 3.1 (1.5)           | 3.1 (1.2)      | 2.7 (1.2)           | F(2,78)=0.397, p=0.674                                                           |
| Digit Span forward (n=87)          | 4.5 (1.9)           | 5.4 (1.6)      | 5.1 (1.6)           | F(2,84)=2.725, p=0.071                                                           |
| Digit Span backward (n=86)         | 2.4 (1.7)           | 2.8 (1.8)      | 2.6 (1.2)           | Chi <sup>2</sup> (2)=0.555, p=0.758                                              |
| Trail Making Test (n=78)           | 23.3 (14.3)         | 20.1 (13.7)    | 21.5 (17.4)         | Chi <sup>2</sup> (2)=0.783, p=0.676                                              |
| Etiology, AD % (n=63)              | 51.9%               | 64.0%          | 90.9%               | Chi <sup>2</sup> =5.159, p=0.063                                                 |
| Walking aid, % (n=89)              | 71.0%               | 60.5%          | 73.3%               | Chi <sup>2</sup> (2)=1.289, p=0.525                                              |
| <i>Single task, stride length</i>  |                     |                |                     |                                                                                  |
| FICSIT-4 (n=88)                    | 2.3 (1.3)           | 2.4 (1.4)      | 2.0 (1.8)           | Chi <sup>2</sup> (2)=1.315, p=0.518                                              |
| Modified 30s CST (n=77)            | 8.1 (3.4)           | 8.6 (3.9)      | 7.0 (2.7)           | F(2,74)=0.906, p=0.409                                                           |
| Modified SPPB (n=84)               | 6.5 (2.9)           | 7.2 (2.5)      | 6.5 (2.9)           | Chi <sup>2</sup> (2)=1.137, p=0.567                                              |
| Clock Drawing Test (n=81)          | 2.8 (1.5)           | 3.2 (1.3)      | 2.5 (0.9)           | F(2,78)=1.671, p=0.195                                                           |
| Digit Span forward (n=87)          | 4.6 (1.8)           | 5.3 (1.7)      | 5.1 (1.9)           | F(2,84)=1.238, p=0.295                                                           |
| Digit Span backward (n=86)         | 2.3 (1.6)           | 2.7 (1.8)      | 2.9 (1.5)           | Chi <sup>2</sup> (2)=0.653, p=0.721                                              |
| Trail Making Test (n=78)           | 19.4 (13.7)         | 21.6 (14.8)    | 25.0 (14.5)         | Chi <sup>2</sup> (2)=1.482, p=0.477                                              |
| Etiology, AD % (n=63)              | 65.0%               | 56.3%          | 81.8%               | Chi <sup>2</sup> =2.222, p=0.324                                                 |
| Walking aid, % (n=89)              | 60.9%               | 62.7%          | 86.7%               | Chi <sup>2</sup> (2)=3.376, p=0.185                                              |
| <i>Single task, double support</i> |                     |                |                     |                                                                                  |
| FICSIT-4 (n=88)                    | 2.3 (1.3)           | 2.4 (1.4)      | 1.7 (1.9)           | Chi <sup>2</sup> (2)=1.930, p=0.381                                              |
| TUG, sec (n=89)                    | 23.7 (10.5)         | 19.9 (9.7)     | 31.2 (22.7)         | Chi <sup>2</sup> (2)=4.807, p=0.090                                              |
| Modified SPPB (n=84)               | 6.5 (2.8)           | 7.3 (2.4)      | 5.4 (3.6)           | Chi <sup>2</sup> (2)=3.029, p=0.220                                              |
| Clock Drawing Test (n=81)          | 3.0 (1.4)           | 3.1 (1.3)      | 2.5 (1.2)           | Chi <sup>2</sup> (2)=1.452, p=0.493                                              |
| Digit Span forward (n=87)          | 4.5 (1.7)           | 5.3 (1.7)      | 5.1 (2.0)           | F(2,84)=1.862, p=0.162                                                           |
| Digit Span backward (n=86)         | 2.1 (1.6)           | 2.9 (1.8)      | 2.7 (1.4)           | Chi <sup>2</sup> (2)=2.861, p=0.243                                              |
| Trail Making Test (n=78)           | 19.7 (15.2)         | 23.2 (13.8)    | 16.1 (15.4)         | Chi <sup>2</sup> (2)=2.411, p=0.300                                              |
| Etiology, AD % (n=63)              | 57.9%               | 63.2%          | 83.3%               | Chi <sup>2</sup> =1.147, p=0.626                                                 |
| Walking aid % (n=89)               | 73.1%               | 61.1%          | 77.8%               | Chi <sup>2</sup> =1.556, p=0.467                                                 |

| <i>Dual task, counting backwards, walking speed</i>  |             |             |             |                                     |
|------------------------------------------------------|-------------|-------------|-------------|-------------------------------------|
| FICSIT-4 (n=61)                                      | 2.8 (1.4)   | 2.8 (1.4)   | 2.2 (1.6)   | Chi <sup>2</sup> (2)=2.368, p=0.306 |
| TUG, sec (n=62)                                      | 19.4 (8.6)  | 17.7 (6.1)  | 23.1 (15.1) | Chi <sup>2</sup> (2)=2.429, p=0.297 |
| Modified 30s CST (n=56)                              | 8.9 (3.0)   | 8.1 (3.1)   | 8.1 (4.0)   | Chi <sup>2</sup> (2)=1.667, p=0.434 |
| Modified SPPB (n=60)                                 | 7.7 (2.2)   | 6.9 (2.1)   | 7.2 (2.9)   | F(2,57)=0.544, p=0.584              |
| Counting backwards (n=62)                            | 17.9 (8.7)  | 15.4 (9.0)  | 17.1 (7.2)  | F(2,59)=0.393, p=0.676              |
| MMSE (n=62)                                          | 19.0 (3.7)  | 18.3 (3.5)  | 18.0 (4.5)  | F(2,59)=0.384, p=0.683              |
| Clock Drawing Test (n=58)                            | 3.4 (1.4)   | 3.6 (1.0)   | 2.8 (0.9)   | Chi <sup>2</sup> (2)=5.333, p=0.070 |
| Digit Span forward (n=61)                            | 5.5 (1.5)   | 5.0 (1.8)   | 5.2 (1.7)   | F(2,58)=0.431, p=0.652              |
| Digit Span backward (n=61)                           | 3.4 (1.7)   | 2.4 (1.7)   | 2.7 (1.5)   | Chi <sup>2</sup> (2)=3.065, p=0.216 |
| Trail Making Test (n=56)                             | 24.0 (13.5) | 20.0 (15.2) | 26.1 (14.2) | F(2,53)=0.762, p=0.472              |
| Etiology, AD % (n=41)                                | 62.5%       | 36.4%       | 71.4%       | Chi <sup>2</sup> =3.157, p=0.230    |
| Walking aid, % (n=62)                                | 62.5%       | 64.3%       | 70.8%       | Chi <sup>2</sup> =0.472, p=0.837    |
| <i>Dual task, counting backwards, stride length</i>  |             |             |             |                                     |
| FICSIT-4 (n=61)                                      | 2.6 (1.2)   | 2.5 (1.5)   | 2.6 (1.6)   | Chi <sup>2</sup> (2)=0.059, p=0.971 |
| Stride length, cm (n=62)                             | 82.7 (16.9) | 81.8 (18.1) | 69.5 (19.8) | F(2,59)=3073, p=0.054               |
| TUG, sec (n=62)                                      | 18.2 (8.3)  | 20.1 (7.5)  | 22.4 (16.9) | Chi <sup>2</sup> (2)=0.682, p=0.711 |
| Modified 30s CST (n=56)                              | 8.7 (3.4)   | 8.5 (3.1)   | 8.1 (3.9)   | F(2,53)=0.138, p=0.871              |
| Modified SPPB (n=60)                                 | 7.8 (2.0)   | 7.0 (2.3)   | 7.6 (3.0)   | F(2,57)=0.613, p=0.545              |
| Counting backwards (n=62)                            | 15.3 (9.3)  | 17.2 (7.4)  | 17.8 (8.9)  | F(2,59)=0.344, p=0.710              |
| MMSE (n=62)                                          | 18.7 (4.1)  | 18.1 (3.8)  | 18.8 (4.3)  | Chi <sup>2</sup> (2)=0.706, p=0.703 |
| Clock Drawing Test (n=58)                            | 3.2 (0.6)   | 3.3 (1.4)   | 3.1 (1.1)   | F(2,55)=0.161, p=0.852              |
| Digit Span forward (n=61)                            | 5.7 (2.0)   | 5.1 (1.6)   | 5.3 (1.4)   | F(2,58)=0.532, p=0.590              |
| Digit Span backward (n=61)                           | 3.2 (1.3)   | 3.0 (1.9)   | 2.7 (1.3)   | Chi <sup>2</sup> (2)=0.920, p=0.631 |
| Trail Making Test (n=56)                             | 22.0 (11.7) | 23.0 (14.7) | 26.1 (15.0) | F(2,53)=0.333, p=0.718              |
| Etiology, AD % (n=41)                                | 62.5%       | 50.0%       | 69.2%       | Chi <sup>2</sup> =1.269, p=0.546    |
| Walking aid, % (n=62)                                | 66.7%       | 64.5%       | 68.4%       | Chi <sup>2</sup> =0.149, p>0.999    |
| <i>Dual task, counting backwards, double support</i> |             |             |             |                                     |
| FICSIT-4 (n=61)                                      | 2.6 (1.2)   | 2.4 (1.6)   | 2.9 (1.5)   | Chi <sup>2</sup> (2)=0.915, p=0.633 |
| TUG, sec (n=62)                                      | 19.5 (8.2)  | 19.0 (7.1)  | 26.8 (22.2) | Chi <sup>2</sup> (2)=0.584, p=0.747 |
| Modified 30s CST (n=56)                              | 8.3 (3.6)   | 8.7 (3.4)   | 7.3 (2.8)   | F(2,53)=0.516, p=0.600              |
| Modified SPPB (n=60)                                 | 7.2 (2.5)   | 7.2 (2.5)   | 7.7 (2.4)   | F(2,57)=0.114, p=0.893              |
| Counting backwards (n=62)                            | 15.9 (8.2)  | 17.9 (8.2)  | 16.2 (8.2)  | F(2,59)=0.407, p=0.668              |
| MMSE (n=62)                                          | 18.8 (3.9)  | 17.9 (3.9)  | 19.6 (4.5)  | F(2,59)=0.885, p=0.418              |
| Clock Drawing Test (n=58)                            | 3.4 (1.4)   | 3.2 (1.0)   | 3.1 (1.4)   | F(2,55)=0.304, p=0.739              |
| Digit Span forward (n=61)                            | 5.0 (1.7)   | 5.4 (1.6)   | 5.4 (1.7)   | Chi <sup>2</sup> (2)=2.528, p=0.283 |
| Digit Span backward (n=61)                           | 3.1 (1.5)   | 2.9 (1.9)   | 2.9 (1.1)   | Chi <sup>2</sup> (2)=0.260, p=0.878 |
| Trail Making Test (n=56)                             | 19.6 (12.7) | 26.3 (14.3) | 22.4 (15.6) | Chi <sup>2</sup> (2)=2.949, p=0.229 |
| Etiology, AD % (n=41)                                | 66.7%       | 52.2%       | 66.7%       | Chi <sup>2</sup> =0.887, p=0.676    |

|                                                  |             |             |             |                                     |
|--------------------------------------------------|-------------|-------------|-------------|-------------------------------------|
| Walking aid, % (n=62)                            | 66.7%       | 64.7%       | 70.0%       | Chi <sup>2</sup> =0.150, p>0.999    |
| <i>Dual task, naming animals, walking speed</i>  |             |             |             |                                     |
| FICSIT-4 (n=61)                                  | 2.7 (1.2)   | 2.4 (1.6)   | 2.5 (1.6)   | Chi <sup>2</sup> (2)=0.338, p=0.844 |
| Modified 30s CST (n=53)                          | 9.7 (3.3)   | 9.2 (4.3)   | 7.2 (2.9)   | F(2,50)=2.518, p=0.091              |
| Modified SPPB (n=59)                             | 7.6 (2.5)   | 7.2 (2.7)   | 6.8 (2.4)   | F(2,56)=0.542, p=0.584              |
| Verbal fluency animals (n=61)                    | 7.9 (3.3)   | 8.7 (4.3)   | 8.1 (3.3)   | F(2,58)=0.240, p=0.787              |
| MMSE (n=61)                                      | 17.4 (4.2)  | 17.7 (4.4)  | 18.1 (4.5)  | F(2,58)=0.121, p=0.886              |
| Clock Drawing Test (n=56)                        | 3.3 (1.6)   | 3.1 (1.3)   | 3.0 (0.8)   | F(2,53)=0.203, p=0.817              |
| Digit Span forward (n=60)                        | 5.2 (1.3)   | 5.1 (1.9)   | 4.9 (2.2)   | Chi <sup>2</sup> (2)=0.634, p=0.728 |
| Digit Span backward (n=60)                       | 2.6 (1.0)   | 3.5 (1.9)   | 2.4 (1.8)   | Chi <sup>2</sup> (2)=5.727, p=0.057 |
| Trail Making Test (n=56)                         | 22.3 (15.1) | 22.5 (13.0) | 20.1 (14.5) | F(2,53)=0.164, p=0.849              |
| Etiology, AD % (n=43)                            | 71.4%       | 71.4%       | 53.3%       | Chi <sup>2</sup> =1.378, p=0.561    |
| Walking aid, % (n=61)                            | 61.9%       | 63.2%       | 76.2%       | Chi <sup>2</sup> (2)=1.178, p=0.555 |
| <i>Dual task, naming animals, stride length</i>  |             |             |             |                                     |
| FICSIT-4 (n=61)                                  | 2.1 (1.4)   | 2.9 (1.4)   | 2.3 (1.6)   | Chi <sup>2</sup> (2)=3.794, p=0.150 |
| TUG, sec (n=61)                                  | 20.8 (9.7)  | 20.2 (14.3) | 24.3 (13.3) | Chi <sup>2</sup> (2)=3.250, p=0.197 |
| Modified 30s CST (n=53)                          | 9.6 (4.1)   | 9.1 (3.6)   | 7.4 (3.2)   | F(2,50)=1.486, p=0.236              |
| Modified SPPB (n=59)                             | 6.9 (2.4)   | 7.7 (2.3)   | 6.7 (2.8)   | F(2,56)=0.944, p=0.395              |
| Verbal fluency animals (n=61)                    | 7.9 (3.3)   | 8.5 (4.1)   | 8.1 (3.2)   | F(2,58)=0.151, p=0.860              |
| MMSE (n=61)                                      | 15.6 (4.1)  | 18.2 (4.1)  | 18.7 (4.6)  | Chi <sup>2</sup> (2)=4.724, p=0.094 |
| Clock Drawing Test (n=56)                        | 3.1 (1.2)   | 3.0 (1.4)   | 3.3 (1.0)   | F(2,53)=0.338, p=0.715              |
| Digit Span forward (n=60)                        | 5.1 (1.3)   | 5.0 (2.0)   | 5.2 (1.9)   | Chi <sup>2</sup> (2)=0.164, p=0.921 |
| Digit Span backward (n=60)                       | 2.6 (1.3)   | 2.9 (1.9)   | 2.8 (1.6)   | F(2,57)=0.149, p=0.862              |
| Trail Making Test (n=56)                         | 19.7 (13.3) | 25.0 (14.0) | 17.4 (13.9) | Chi <sup>2</sup> (2)=2.758, p=0.252 |
| Etiology, AD % (n=43)                            | 75.0%       | 58.3%       | 72.7%       | Chi <sup>2</sup> =1.028, p=0.688    |
| <i>Dual task, naming animals, double support</i> |             |             |             |                                     |
| FICSIT-4 (n=61)                                  | 2.6 (1.5)   | 2.7 (1.4)   | 2.0 (1.6)   | Chi <sup>2</sup> (2)=2.576, p=0.276 |
| TUG, sec (n=61)                                  | 20.1 (10.4) | 20.2 (13.2) | 26.4 (14.8) | Chi <sup>2</sup> (2)=3.326, p=0.190 |
| Modified 30s CST (n=53)                          | 9.8 (3.6)   | 9.0 (3.5)   | 6.6 (3.6)   | F(2,53)=2.483, p=0.094              |
| Modified SPPB (n=59)                             | 7.5 (2.7)   | 7.6 (2.2)   | 5.8 (2.9)   | F(2,56)=2.366, p=0.103              |
| Verbal fluency animals (n=61)                    | 7.6 (2.7)   | 9.1 (4.0)   | 6.6 (2.9)   | F(2,58)=2.592, p=0.084              |
| MMSE (n=61)                                      | 16.8 (3.9)  | 18.3 (4.5)  | 17.3 (4.4)  | Chi <sup>2</sup> (2)=1.889, p=0.389 |
| Clock Drawing Test (n=56)                        | 3.5 (1.8)   | 2.9 (1.2)   | 3.2 (0.8)   | F(2,56)=0.809, p=0.451              |
| Digit Span forward (n=60)                        | 5.1 (1.3)   | 5.1 (2.1)   | 5.0 (1.5)   | Chi <sup>2</sup> (2)=0.118, p=0.943 |
| Digit Span backward (n=60)                       | 2.5 (1.2)   | 3.2 (1.8)   | 2.3 (1.6)   | F(2,57)=1.563, p=0.218              |
| Trail Making Test (n=56)                         | 21.2 (14.2) | 24.3 (13.5) | 15.5 (14.0) | Chi <sup>2</sup> (2)=3.505, p=0.173 |
| Etiology, AD % (n=43)                            | 75.0%       | 62.5%       | 63.6%       | Chi <sup>2</sup> =0.453, p=0.910    |

---

|                       |       |       |       |                                  |
|-----------------------|-------|-------|-------|----------------------------------|
| Walking aid, % (n=61) | 71.4% | 61.8% | 76.9% | Chi <sup>2</sup> =1.042, p=0.663 |
|-----------------------|-------|-------|-------|----------------------------------|

---

30s CST: 30-second chair stand test, AD: Alzheimer's disease, df: degrees of freedom, FICSIT-4: Frailty and Injuries: Cooperative Studies of Intervention Techniques - subtest 4, M: mean, MMSE: Mini-Mental State Examination, n: number, SD: standard deviation, SPPB: Short Physical Performance Battery, TUG: Timed Up & Go Test
