# Supplementary material for: Effects of a 16-week multimodal exercise program on gait performance in individuals with dementia: a multicenter randomized controlled trial
Source: PubMed Central journal article supplement (PMC7364487; doi:10.1186/s12877-020-01635-3), 2020-07-16
Supplement: 12877_2020_1635_MOESM4_ESM.pdf [file 12877_2020_1635_MOESM4_ESM.pdf]

**Additional file 4.** Heterogeneity of sample in motor and cognitive baseline performance (per protocol)

|                                           | <b>Total sample</b>              | <b>Intervention group</b>       | <b>Control group</b>            |
|-------------------------------------------|----------------------------------|---------------------------------|---------------------------------|
| <b>Balance</b>                            |                                  |                                 |                                 |
| FICSIT-4<br>[Median (IQR), range]         | 2 (2), 0-5<br>(n=160)            | 2 (2.5), 0-5<br>(n=89)          | 2 (2), 0-4<br>(n=71)            |
| <b>Mobility</b>                           |                                  |                                 |                                 |
| TUG, sec<br>[Mean (SD), range]            | 22.5 (11.2), 9.0-85.0<br>(n=160) | 22.3 (12.2), 9.7-85.0<br>(n=90) | 22.7 (10.0), 9.0-61.0<br>(n=70) |
| <b>Lower limb strength &amp; function</b> |                                  |                                 |                                 |
| modified 30s CST<br>[Mean (SD), range]    | 8.0 (3.6), 1-19<br>(n=141)       | 8.1 (3.7), 1-19<br>(n=78)       | 7.9 (3.6), 2-17<br>(n=63)       |
| SPPB<br>[Mean (SD), range]                | 6.5 (2.7), 1-12<br>(n=152)       | 6.8 (2.8), 1-12<br>(n=85)       | 6.2 (2.6), 1-12<br>(n=67)       |
| <b>Executive function</b>                 |                                  |                                 |                                 |
| Clock Drawing Test<br>[Mean (SD), range]  | 3.0 (1.5), 1-9<br>(n=152)        | 3.0 (1.3), 1-8<br>(n=82)        | 3.1 (1.7), 1-9<br>(n=70)        |
| Trail Making Test<br>[Mean (SD), range]   | 21.3 (13.0), 0-48<br>(n=144)     | 21.5 (14.3), 0-48<br>(n=79)     | 21.0 (11.4), 1-43<br>(n=65)     |
| <b>Attention &amp; working memory</b>     |                                  |                                 |                                 |
| Digit Span forward<br>[Mean (SD), range]  | 5.0 (1.7), 1-10<br>(n=161)       | 5.0 (1.7), 1-10<br>(n=88)       | 5.0 (1.8), 1-9<br>(n=73)        |
| Digit Span backward<br>[Mean (SD), range] | 2.8 (1.7), 0-6<br>(n=160)        | 2.7 (1.7), 0-6<br>(n=87)        | 2.9 (1.7), 0-6<br>(n=73)        |

30s CST: 30-second chair stand test, FICSIT-4: Frailty and Injuries: Cooperative Studies of Intervention Techniques - subtest 4, IQR: interquartile range, n: number, SD: standard deviation, SPPB: Short Physical Performance Battery, TUG: Timed Up & Go Test
